# Supplementary material
Source: PubMed Central journal article supplement (PMC4888055)
Supplement: NIHMS784205-supplement-SI.pdf [file NIHMS784205-supplement-SI.pdf]

## Supporting Information

### **Strong Inhibition of O-Atom Transfer Reactivity for $\text{Mn}^{\text{IV}}(\text{O})(\pi\text{-radical-cation})(\text{Lewis acid})$ Versus $\text{Mn}^{\text{V}}(\text{O})$ Porphyrinoid Complexes**

*Jan Paulo T. Zaragoza, Regina A. Baglia, Maxime A. Siegler, and David P. Goldberg\**

Department of Chemistry, The Johns Hopkins University, 3400 N. Charles Street, Baltimore, MD 21218, USA

\*E-mail: [dpg@jhu.edu](mailto:dpg@jhu.edu)

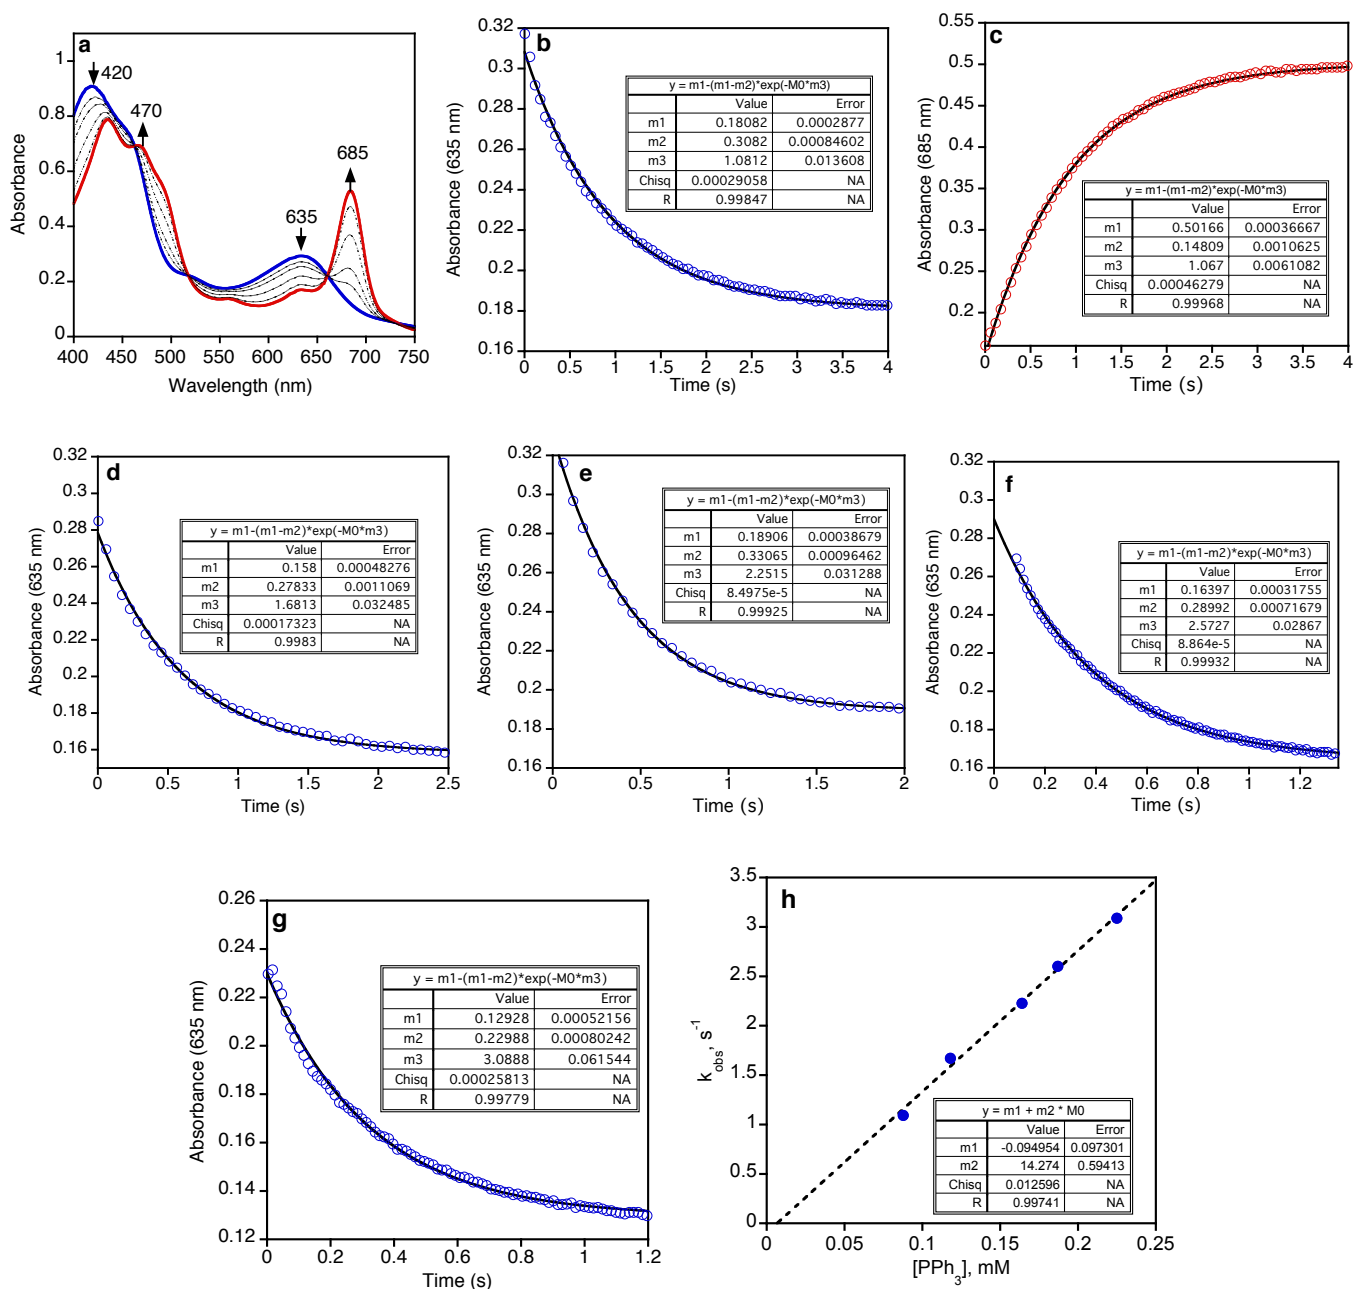

**Figure S1.** a) Stopped-flow UV-vis spectral changes (0 – 4 s) for the reaction of Mn<sup>V</sup>(O)(TBP<sub>8</sub>Cz) (13 μM) (blue line) and PPh<sub>3</sub> (0.09 mM) forming Mn<sup>III</sup>(TBP<sub>8</sub>Cz) (red line) in CH<sub>2</sub>Cl<sub>2</sub> at 25 °C. b) Changes in absorbance at 635 nm over time following the decay of Mn<sup>V</sup>(O)(TBP<sub>8</sub>Cz). c) Changes in absorbance at 685 nm over time following the growth of Mn<sup>III</sup>(TBP<sub>8</sub>Cz). Changes in absorbance at 635 nm over time following the decay of Mn<sup>V</sup>(O)(TBP<sub>8</sub>Cz) after addition of varying amounts of PPh<sub>3</sub>: d) 0.12 mM, e) 0.16 mM, f) 0.19 mM, and g) 0.23 mM. h) Plot of  $k_{obs}$  versus  $[PPh_3]$ .

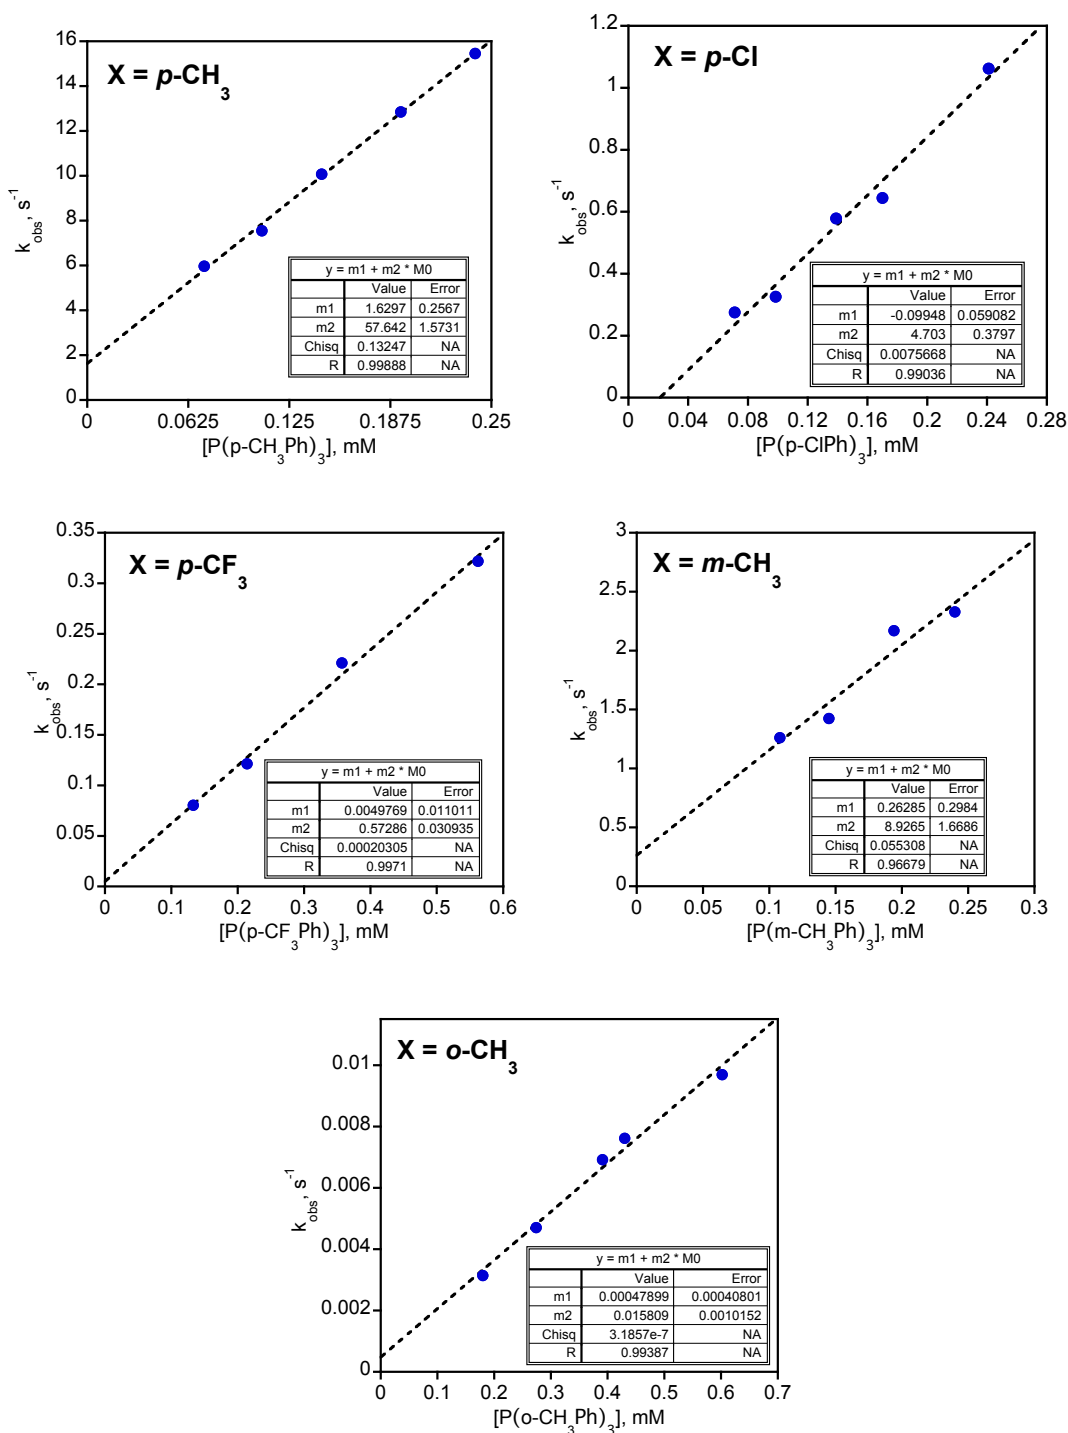

**Figure S2.** Plots of  $k_{obs}$  versus  $[P(X-Ph)_3]$  for the reaction of  $Mn^V(O)(TBP_8Cz)$  ( $13 \mu M$ ) in  $CH_2Cl_2$  at  $25^\circ C$  with substituted triarylphosphines: X = *p*-CH<sub>3</sub> (0.07 – 0.24 mM), *p*-Cl (0.07 – 0.24 mM), *p*-CF<sub>3</sub> (0.13 – 0.56 mM), *m*-CH<sub>3</sub> (0.11 – 0.24 mM), *o*-CH<sub>3</sub> (0.18 – 0.60 mM).

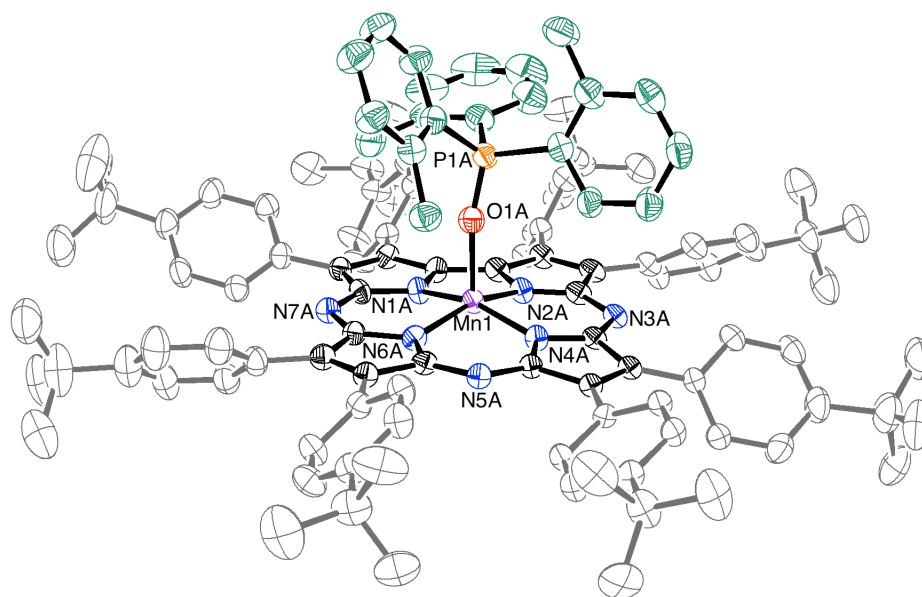

**Figure S3.** Displacement ellipsoid plot (50% probability level) of  $\text{Mn}^{\text{III}}(\text{OP}(o\text{-tolyl})_3)(\text{TBP}_8\text{Cz})$  (**2a**) at 110(2) K. The disorder, H atoms and solvent molecules are omitted for clarity.



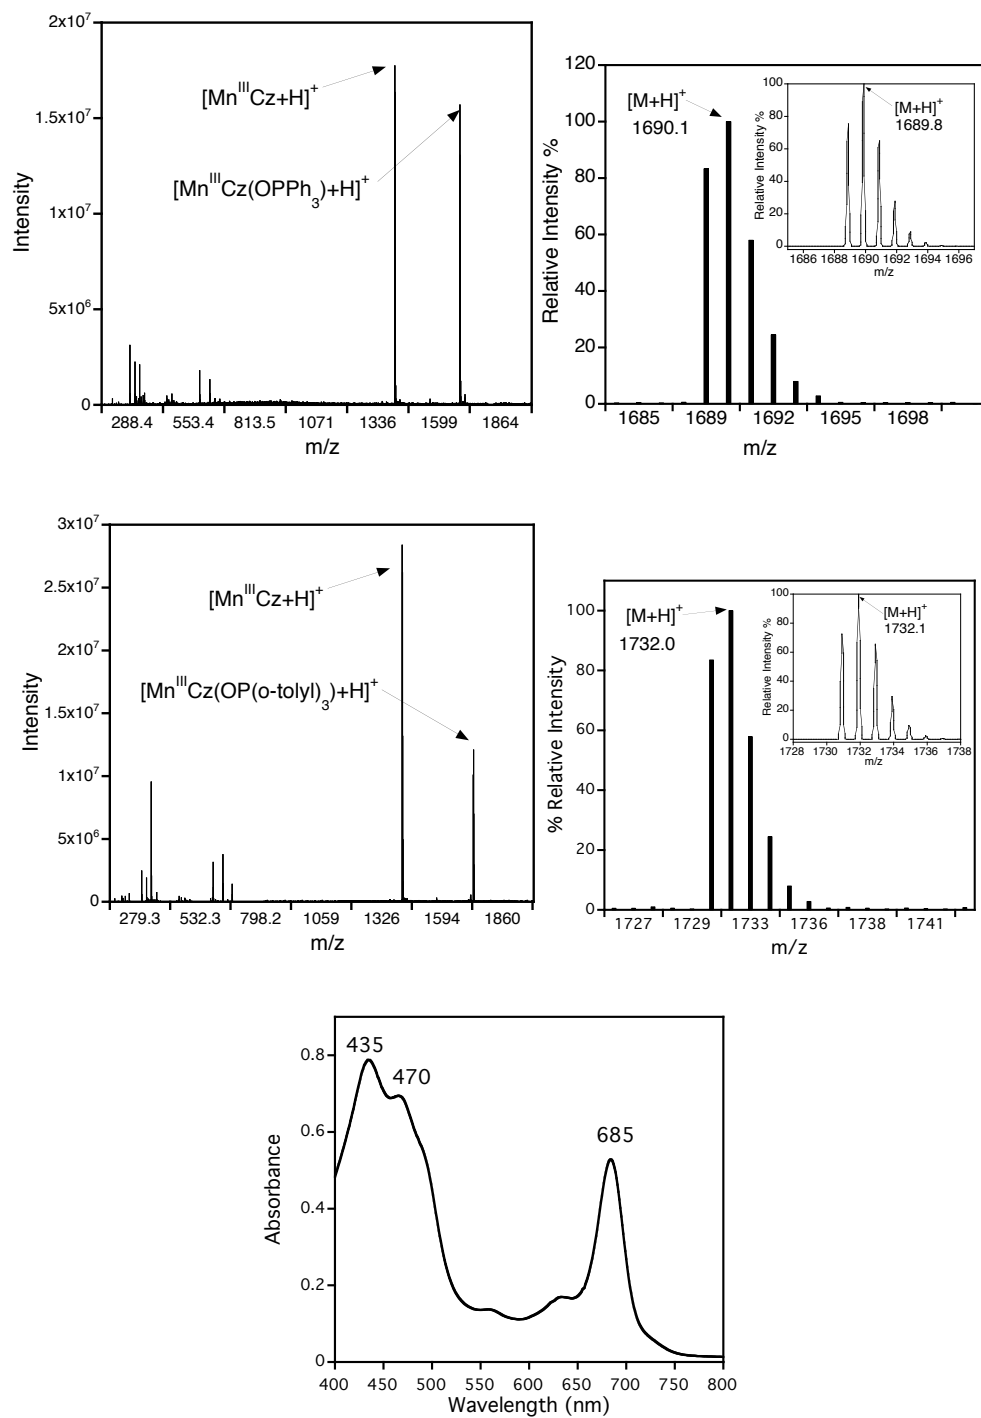

**Figure S4.** ESI-MS spectra and experimental isotope pattern for the  $[\text{M}+\text{H}]^+$  peak (inset: calculated isotope pattern for the  $[\text{M}+\text{H}]^+$  peak) for  $\text{Mn}^{\text{III}}(\text{OPPh}_3)(\text{TBP}_8\text{Cz})$  (top) and  $\text{Mn}^{\text{III}}(\text{OP}(o\text{-tolyl})_3)(\text{TBP}_8\text{Cz})$  (middle). UV-vis spectra of  $\text{Mn}^{\text{III}}(\text{OPPh}_3)(\text{TBP}_8\text{Cz})$  crystals in  $\text{CH}_2\text{Cl}_2$  (bottom).

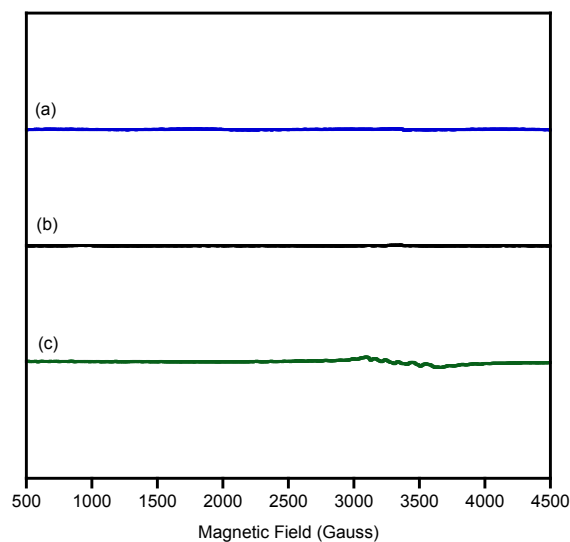

**Figure S5.** X-band EPR spectra for a)  $\text{Mn}^{\text{III}}(\text{TBP}_8\text{Cz})$  (2 mM) +  $\text{Zn}(\text{OTf})_2$  (2 equiv) in  $\text{CH}_2\text{Cl}_2:\text{CH}_3\text{CN}$  (5:1 v/v), b)  $\text{Mn}^{\text{III}}(\text{TBP}_8\text{Cz})$  (2 mM) in  $\text{CH}_2\text{Cl}_2$ , c)  $\text{Mn}^{\text{IV}}(\text{O})(\text{TBP}_8\text{Cz}^{++}):\text{Zn}^{\text{II}}$  (2 mM) + 10  $\text{PPh}_3$  in  $\text{CH}_2\text{Cl}_2:\text{CH}_3\text{CN}$  (25:1 v/v). EPR parameters:  $T = 13$  K, freq. = 9.448 GHz, power = 20.0 mW, mod. amp. = 10 G, mod. freq. = 100 kHz, receiver gain =  $5.00 \times 10^3$ . Spectra were an average of 2 scans. The lack of an EPR signal in (a) and (b) is expected for an integer-spin  $\text{Mn}^{\text{III}}$  ( $S = 2$ ) complex. A similar absence of an intense EPR signal is seen for (c), consistent with the  $\text{Mn}^{\text{III}}$  product formed from the two-electron O-atom transfer reaction between  $\text{Mn}^{\text{IV}}(\text{O})(\text{TBP}_8\text{Cz}^{++}):\text{Zn}^{\text{II}}$  and  $\text{PPh}_3$ . The residual 6-line signal observed at  $g = 2$  in (c) is assigned to a minor  $\text{Mn}^{\text{II}}$  impurity. This signal was previously observed upon decomposition of  $\text{Mn}^{\text{III}}(\text{TBP}_8\text{Cz})$  with a strong acid ( $\text{HOTf}$ ), and has a characteristic hyperfine coupling constant of  $A_{\text{iso}}(^{55}\text{Mn}) = 120$  G.

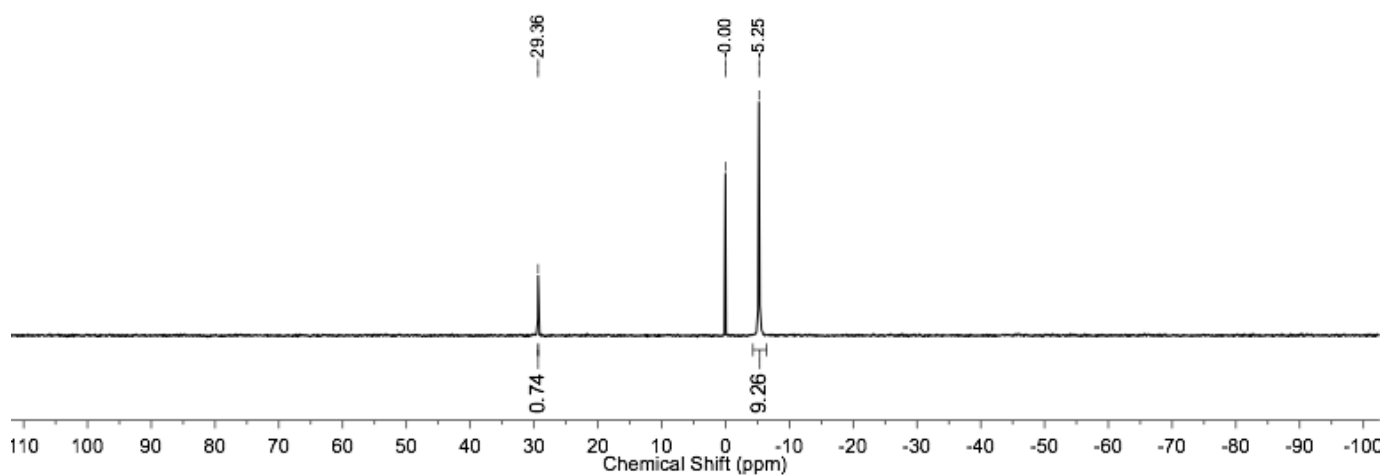

**Figure S6.**  $^{31}\text{P}\{^1\text{H}\}$  NMR spectrum for the reaction mixture of  $\text{Mn}^{\text{IV}}(\text{O})(\text{TBP}_8\text{Cz}^{++}):\text{Zn}^{\text{II}}$  + 10  $\text{PPh}_3$  after addition of excess  $\text{Bu}_4\text{N}^+\text{F}^-$  in  $\text{CD}_2\text{Cl}_2:\text{CD}_3\text{CN}$  (10:1 v/v). Peaks for  $\text{PPh}_3$  ( $\delta = -5.2$  ppm) and  $\text{OPPh}_3$  ( $\delta = 29.4$  ppm) were observed, and chemical shifts were referenced to an external 85%  $\text{H}_3\text{PO}_4$  standard ( $\delta = 0$  ppm). A yield of 74% for  $\text{OPPh}_3$  was obtained by comparison of the integrations for  $\text{PPh}_3$  and  $\text{OPPh}_3$ .

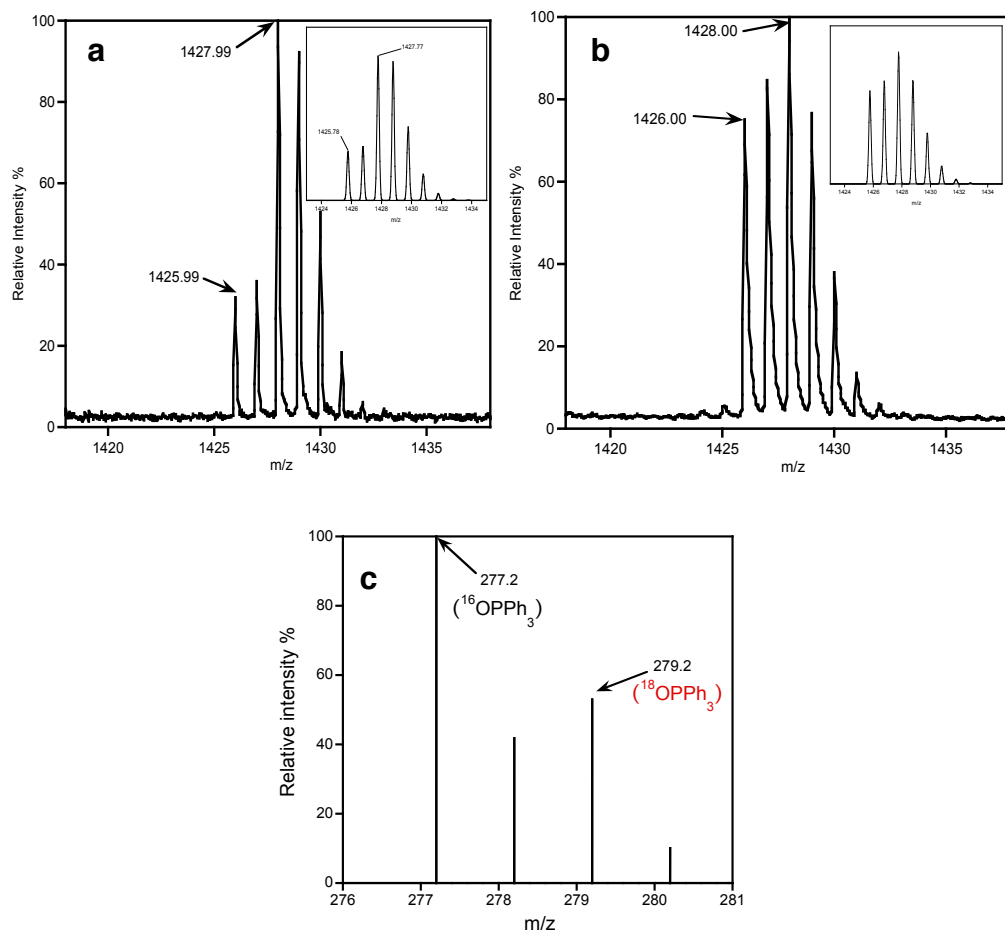

**Figure S7.** a) LDI-MS spectrum (positive ion mode) for  $\text{Mn}^{\text{V}}(^{18}\text{O})(\text{TBP}_8\text{Cz})$  showing the isotope distribution pattern which corresponds to 70% incorporation of  $^{18}\text{O}$ . Inset: theoretical simulation. b) LDI-MS spectrum (positive ion mode) for the  $\text{Mn}^{\text{IV}}(^{18}\text{O})(\text{TBP}_8\text{Cz}^+)$  fragment of  $\text{Mn}^{\text{IV}}(^{18}\text{O})(\text{TBP}_8\text{Cz}^+):\text{Zn}^{\text{II}}$  showing the isotope distribution pattern which corresponds to 40% incorporation of  $^{18}\text{O}$ . Inset: theoretical simulation. c) EI-MS spectrum of the isolated  $^{18}\text{OPPh}_3$  extracted ( $\text{CH}_3\text{OH}$ ) from the reaction of the sample in (b) +  $\text{PPh}_3$  (10 equiv). A total of 88% incorporation of  $^{18}\text{O}$  was observed.

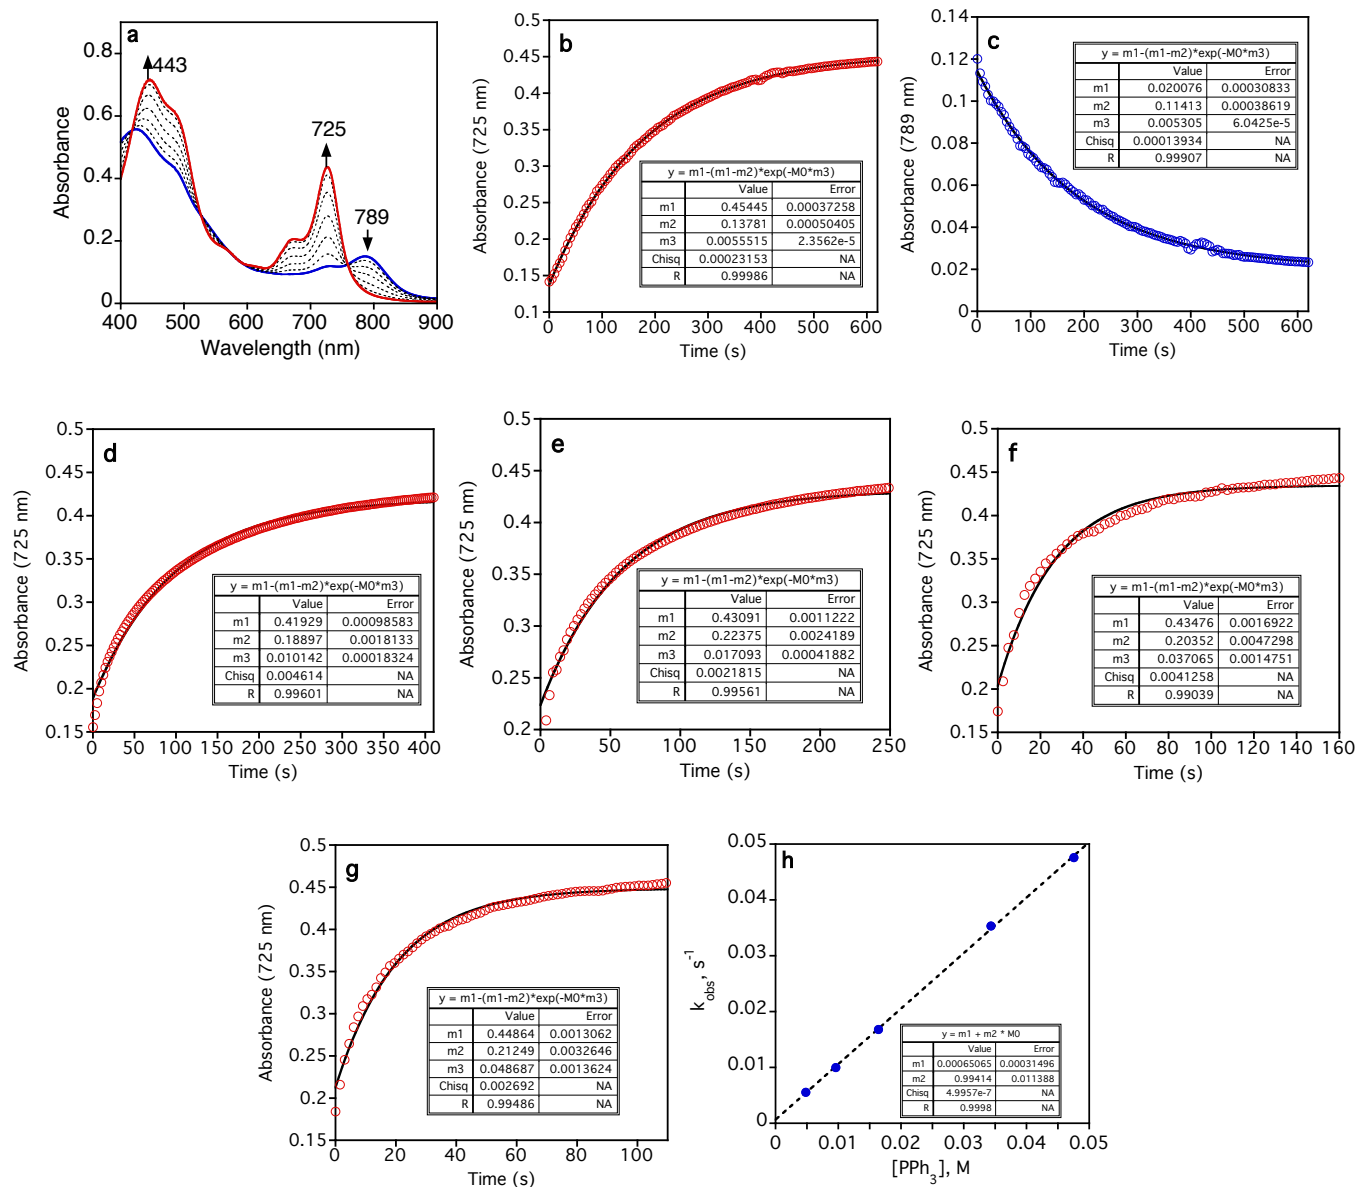

**Figure S8.** a) Representative UV-vis spectral changes (0-600 s) for the reaction of  $\text{Mn}^{\text{IV}}(\text{O})(\text{TBP}_8\text{Cz}^+):\text{Zn}^{\text{II}}$  (13  $\mu\text{M}$ ) (blue line) and  $\text{PPh}_3$  (0.005 M) forming  $\text{Mn}^{\text{III}}(\text{TBP}_8\text{Cz}):\text{Zn}^{\text{II}}$  (red line) in 100:1 v/v  $\text{CH}_2\text{Cl}_2/\text{CH}_3\text{CN}$  at 25 °C. b) Changes in absorbance at 725 nm over time following the growth of  $\text{Mn}^{\text{III}}(\text{TBP}_8\text{Cz}):\text{Zn}^{\text{II}}$ . c) Changes in absorbance at 789 nm over time following the decay of  $\text{Mn}^{\text{IV}}(\text{O})(\text{TBP}_8\text{Cz}^+):\text{Zn}^{\text{II}}$ . (d-g) Changes in absorbance at 725 nm over time for the production of  $\text{Mn}^{\text{III}}(\text{TBP}_8\text{Cz}):\text{Zn}^{\text{II}}$  after addition of varying amounts of  $\text{PPh}_3$ : d) 0.010 M, e) 0.016 M, f) 0.034 M, and g) 0.047 M. h) Plot of  $k_{\text{obs}}$  versus  $[\text{PPh}_3]$ .

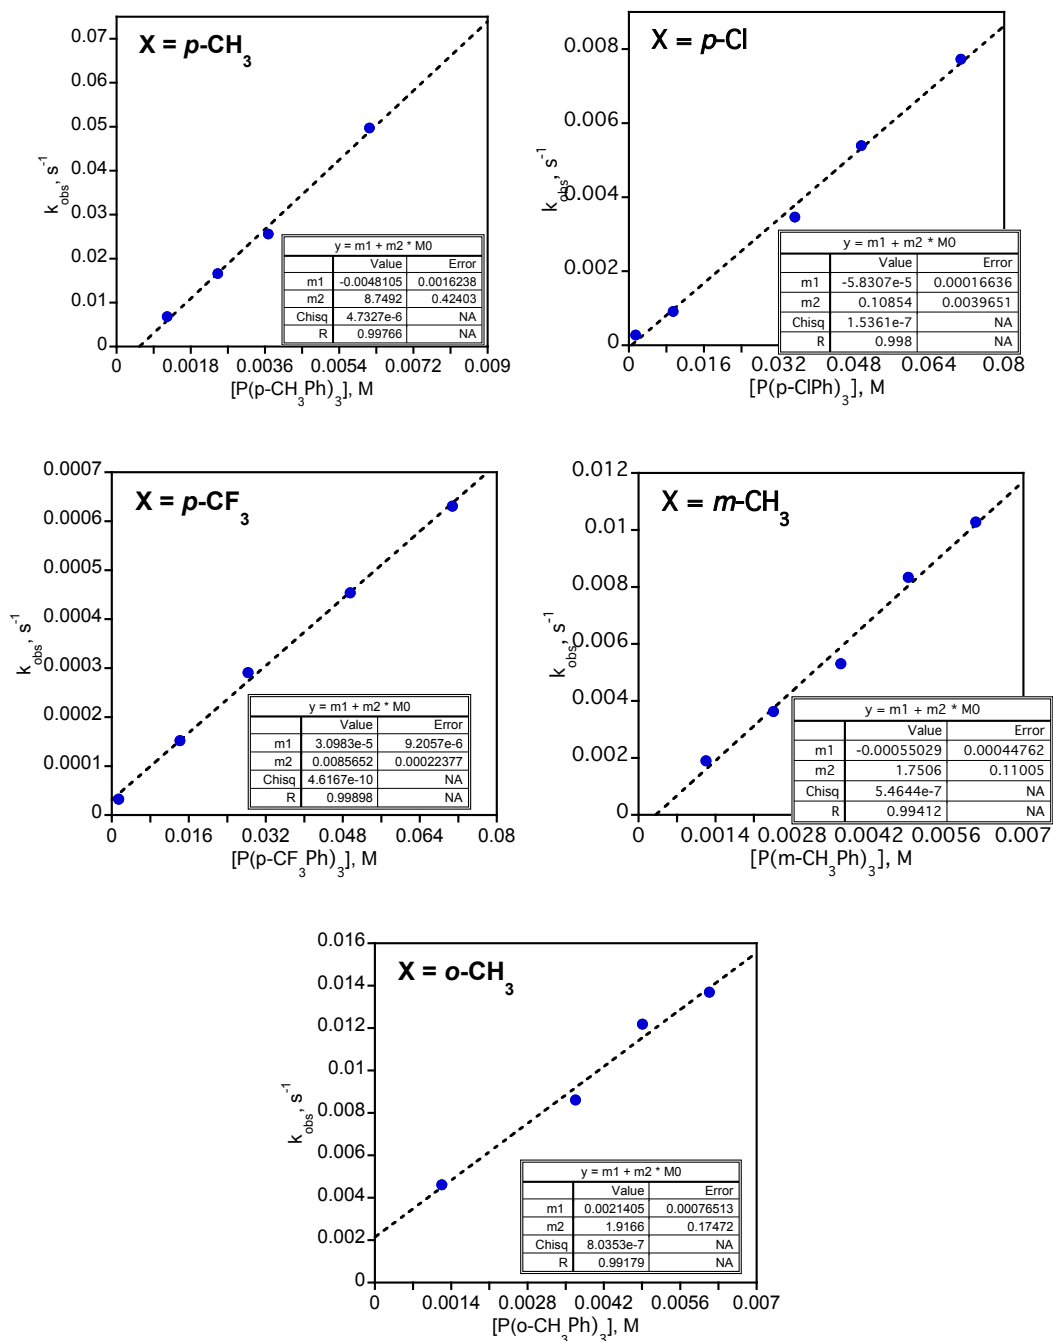

**Figure S9.** Plots of  $k_{obs}$  versus  $[P(X-Ph)_3]$  for the reaction of  $Mn^{IV}(O)(TBP_8Cz^{**}):Zn^{II}$  (13  $\mu M$ ) in 100:1 v/v  $CH_2Cl_2/CH_3CN$  at 25 °C with substituted triarylphosphines: X = *p*-CH<sub>3</sub> (0.001 – 0.006 M), *p*-Cl (0.001 – 0.07 M), *p*-CF<sub>3</sub> (0.001 – 0.07 M), *m*-CH<sub>3</sub> (0.001 – 0.006 M), *o*-CH<sub>3</sub> (0.001 – 0.006 M).

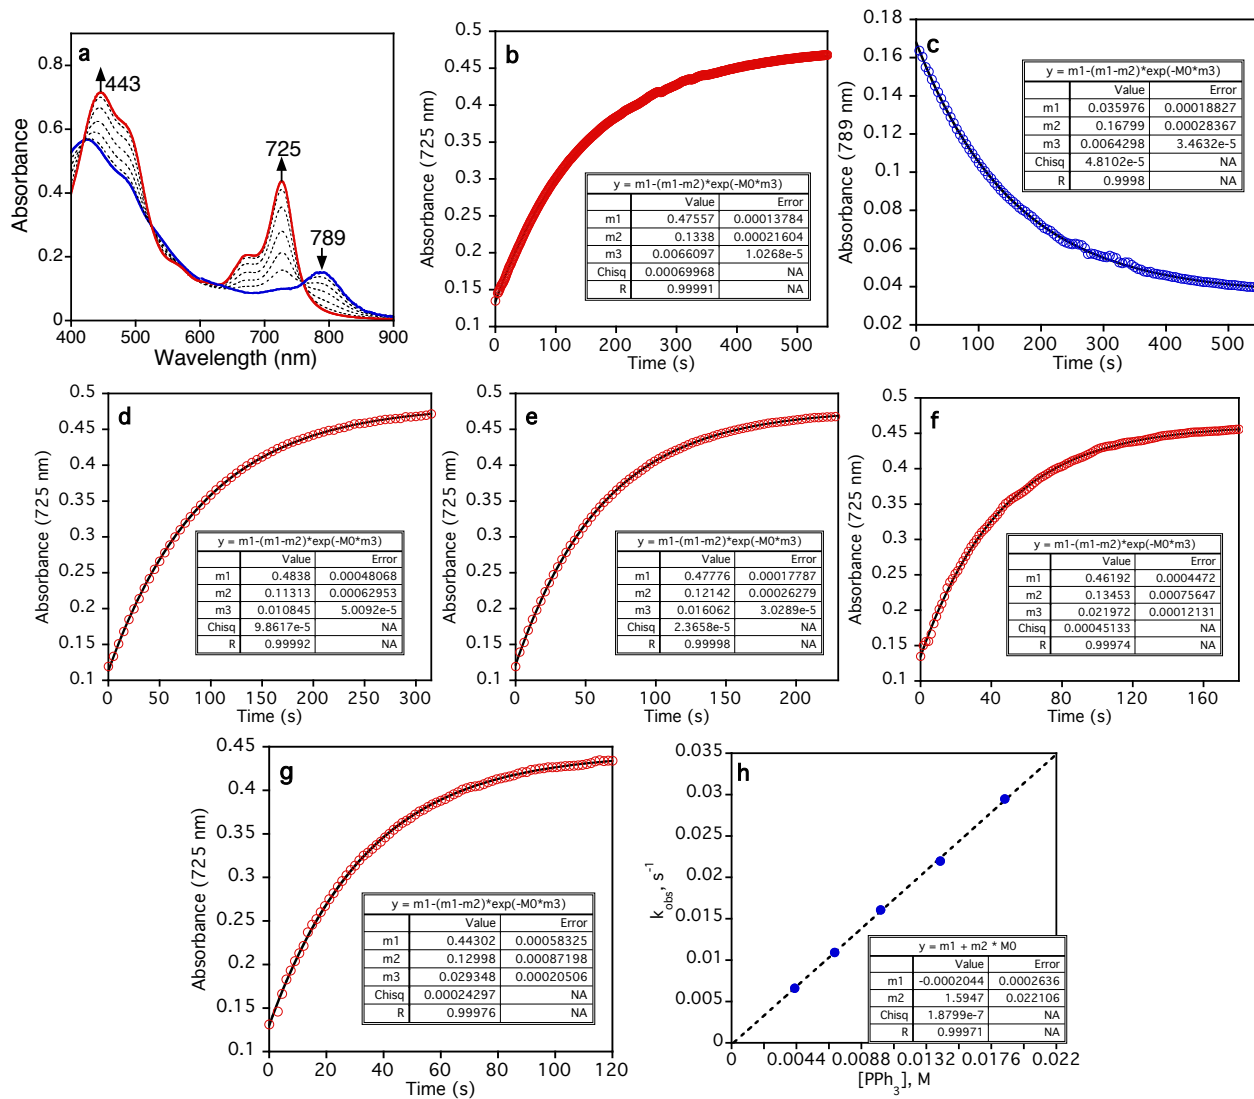

**Figure S10.** a) Representative UV-vis spectral changes (0-600 s) for the reaction of  $\text{Mn}^{\text{IV}}(\text{O})(\text{TBP}_8\text{Cz}^+):\text{B}(\text{C}_6\text{F}_5)_3$  (13  $\mu\text{M}$ ) (blue line) and  $\text{PPh}_3$  (0.004 M) forming  $\text{Mn}^{\text{III}}(\text{TBP}_8\text{Cz}):\text{B}(\text{C}_6\text{F}_5)_3$  (red line) in  $\text{CH}_2\text{Cl}_2$  at 25 °C. b) Changes in absorbance at 725 nm over time following the growth of  $\text{Mn}^{\text{III}}(\text{TBP}_8\text{Cz}):\text{B}(\text{C}_6\text{F}_5)_3$ . c) Changes in absorbance at 789 nm over time following the decay of  $\text{Mn}^{\text{IV}}(\text{O})(\text{TBP}_8\text{Cz}^+):\text{B}(\text{C}_6\text{F}_5)_3$ . Changes in absorbance at 725 nm over time for the production of  $\text{Mn}^{\text{III}}(\text{TBP}_8\text{Cz}):\text{B}(\text{C}_6\text{F}_5)_3$  after addition of varying amounts of  $\text{PPh}_3$ : d) 0.007 M, e) 0.01 M, f) 0.014 M, and g) 0.0185 M. h) Plot of  $k_{\text{obs}}$  versus  $[\text{PPh}_3]$ .

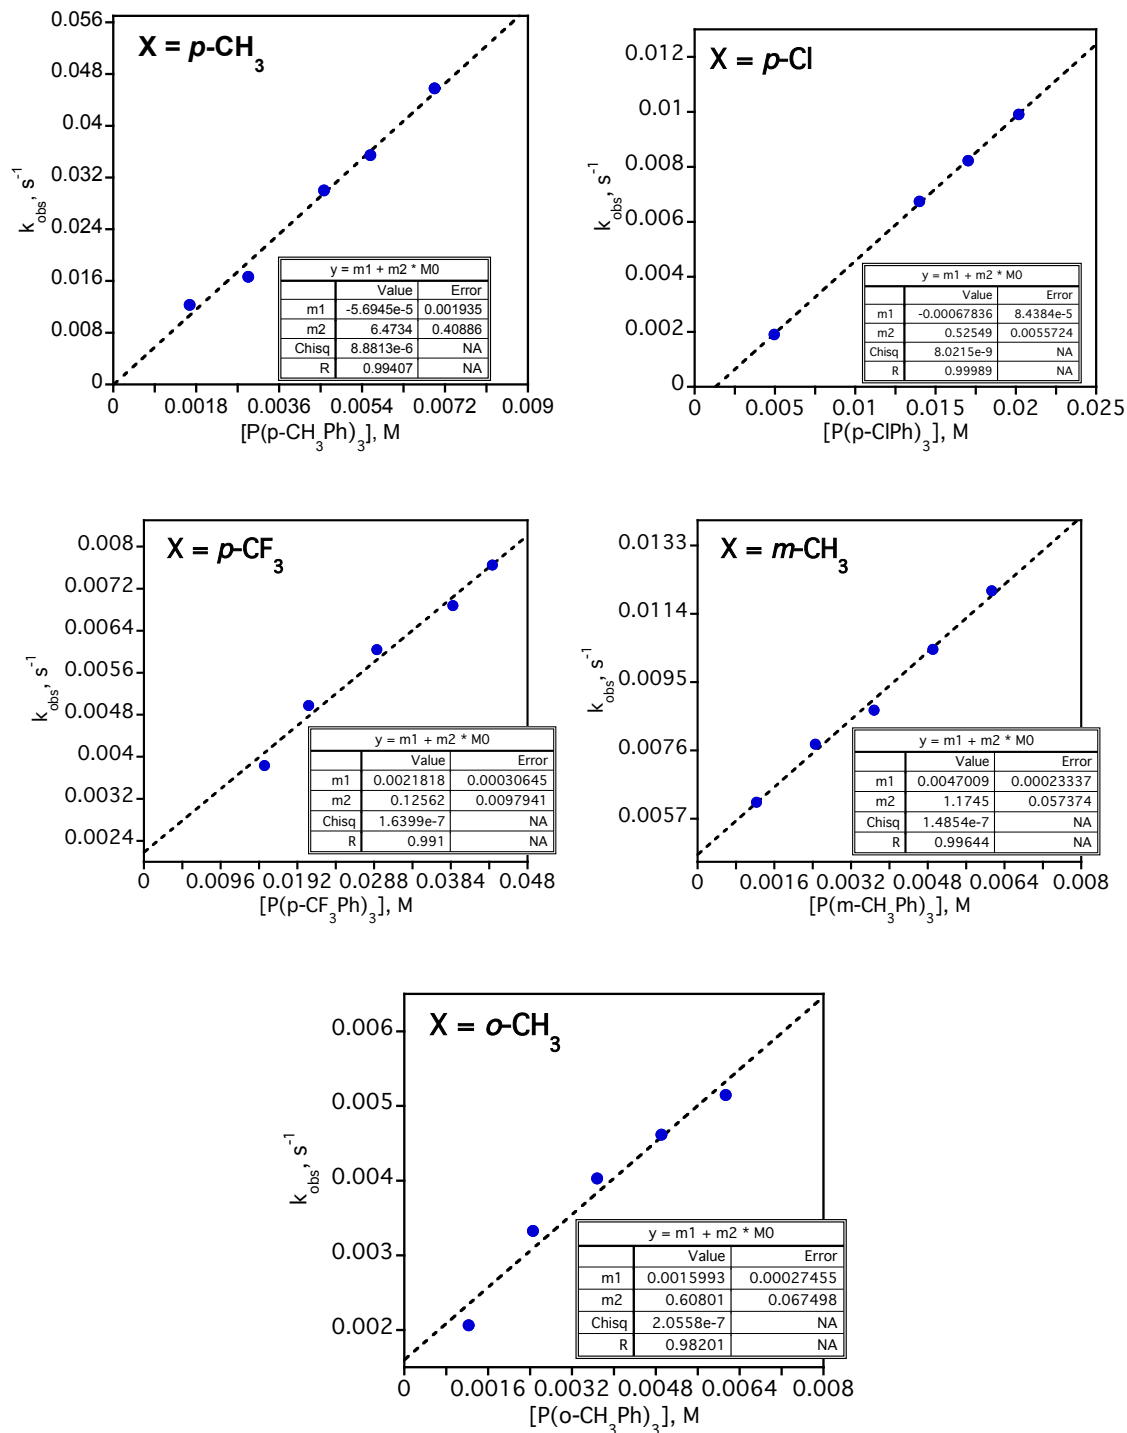

**Figure S11.** Plots of  $k_{obs}$  versus  $[P(X-Ph)_3]$  for the reaction of  $Mn^{IV}(O)(TBP_8Cz^+):B(C_6F_5)_3$  (13  $\mu M$ ) in  $CH_2Cl_2$  at 25 °C with substituted triarylphosphines: X = *p*-CH<sub>3</sub> (0.0017 – 0.007 M), *p*-Cl (0.005 – 0.02 M), *p*-CF<sub>3</sub> (0.015 – 0.043 M), *m*-CH<sub>3</sub> (0.001 – 0.006 M), *o*-CH<sub>3</sub> (0.001 – 0.006 M).

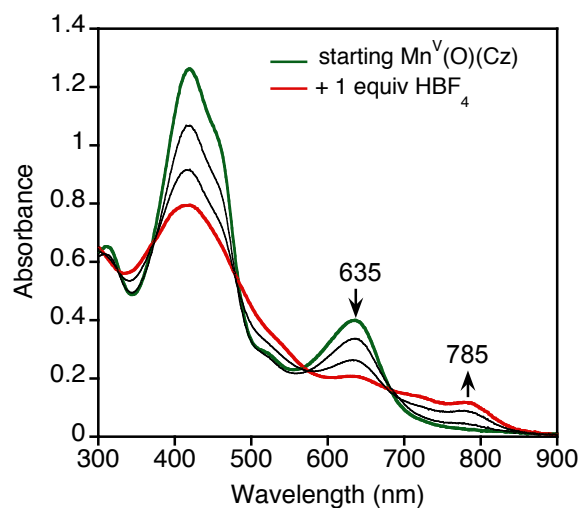

**Figure S12.** UV-vis spectra of  $\text{Mn}^{\text{V}}\text{O}(\text{TBP}_8\text{Cz})$  ( $20\ \mu\text{M}$ ) before (green line) and after (red line) the addition of  $\text{HBF}_4 \cdot \text{Et}_2\text{O}$  (1 equiv) in  $\text{CH}_2\text{Cl}_2$  at  $25^\circ\text{C}$ . The red spectrum is assigned as  $\text{Mn}^{\text{IV}}\text{O}(\text{TBP}_8\text{Cz}^+):\text{H}^+$ .

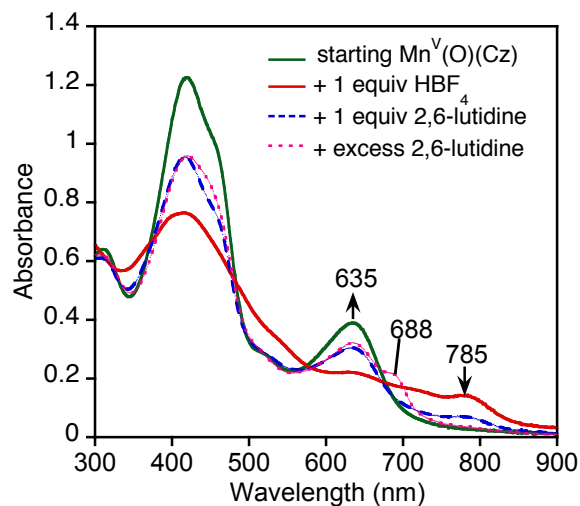

**Figure S13.** UV-vis spectra of recovery of  $\text{Mn}^{\text{V}}\text{O}(\text{TBP}_8\text{Cz})$  by addition of 2,6-lutidine in  $\text{CH}_2\text{Cl}_2$  at  $25^\circ\text{C}$ .  $\text{Mn}^{\text{IV}}\text{O}(\text{TBP}_8\text{Cz}^+):\text{H}^+$  ( $20\ \mu\text{M}$ ) (red line), after addition of 2,6-lutidine (1 equiv), leads to a partially ( $\sim 75\%$ ) recovered  $\text{Mn}^{\text{V}}\text{O}(\text{TBP}_8\text{Cz})$  (dotted blue line). Addition of excess 2,6-lutidine (1000 equiv) leads to formation of a  $\text{Mn}^{\text{III}}(\text{TBP}_8\text{Cz})$  product (dotted pink line).



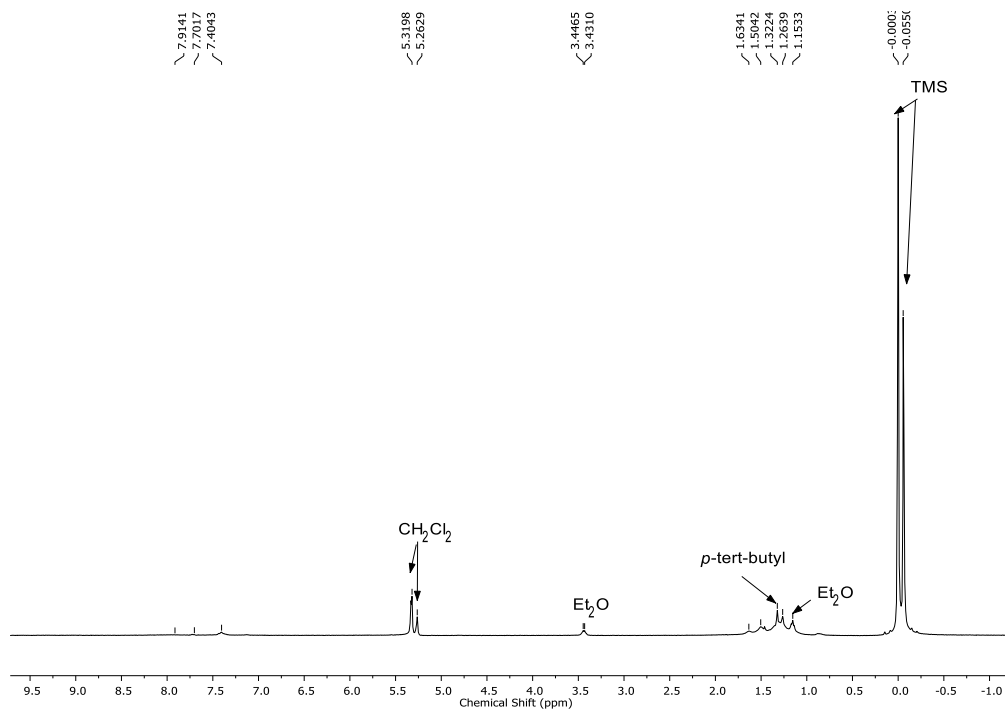

**Figure S14.** Evans method <sup>1</sup>H NMR spectrum of Mn<sup>IV</sup>O(TBP<sub>8</sub>Cz<sup>+</sup>):H<sup>+</sup> (2.0 mM) with 0.5% TMS in CD<sub>2</sub>Cl<sub>2</sub> at 297 K. Δν(TMS) = 22 Hz.

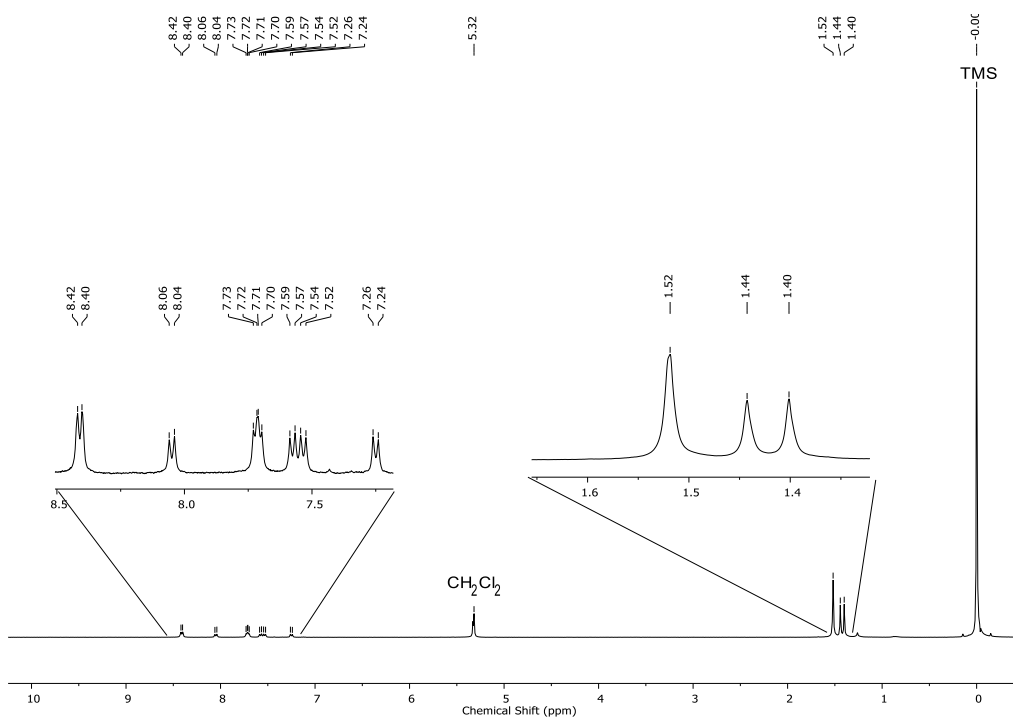

**Figure S15.** Evans method <sup>1</sup>H NMR spectrum of Mn<sup>V</sup>O(TBP<sub>8</sub>Cz) (2.0 mM) with 0.5% TMS in CD<sub>2</sub>Cl<sub>2</sub> at 297 K. No shift in the TMS peak was observed.

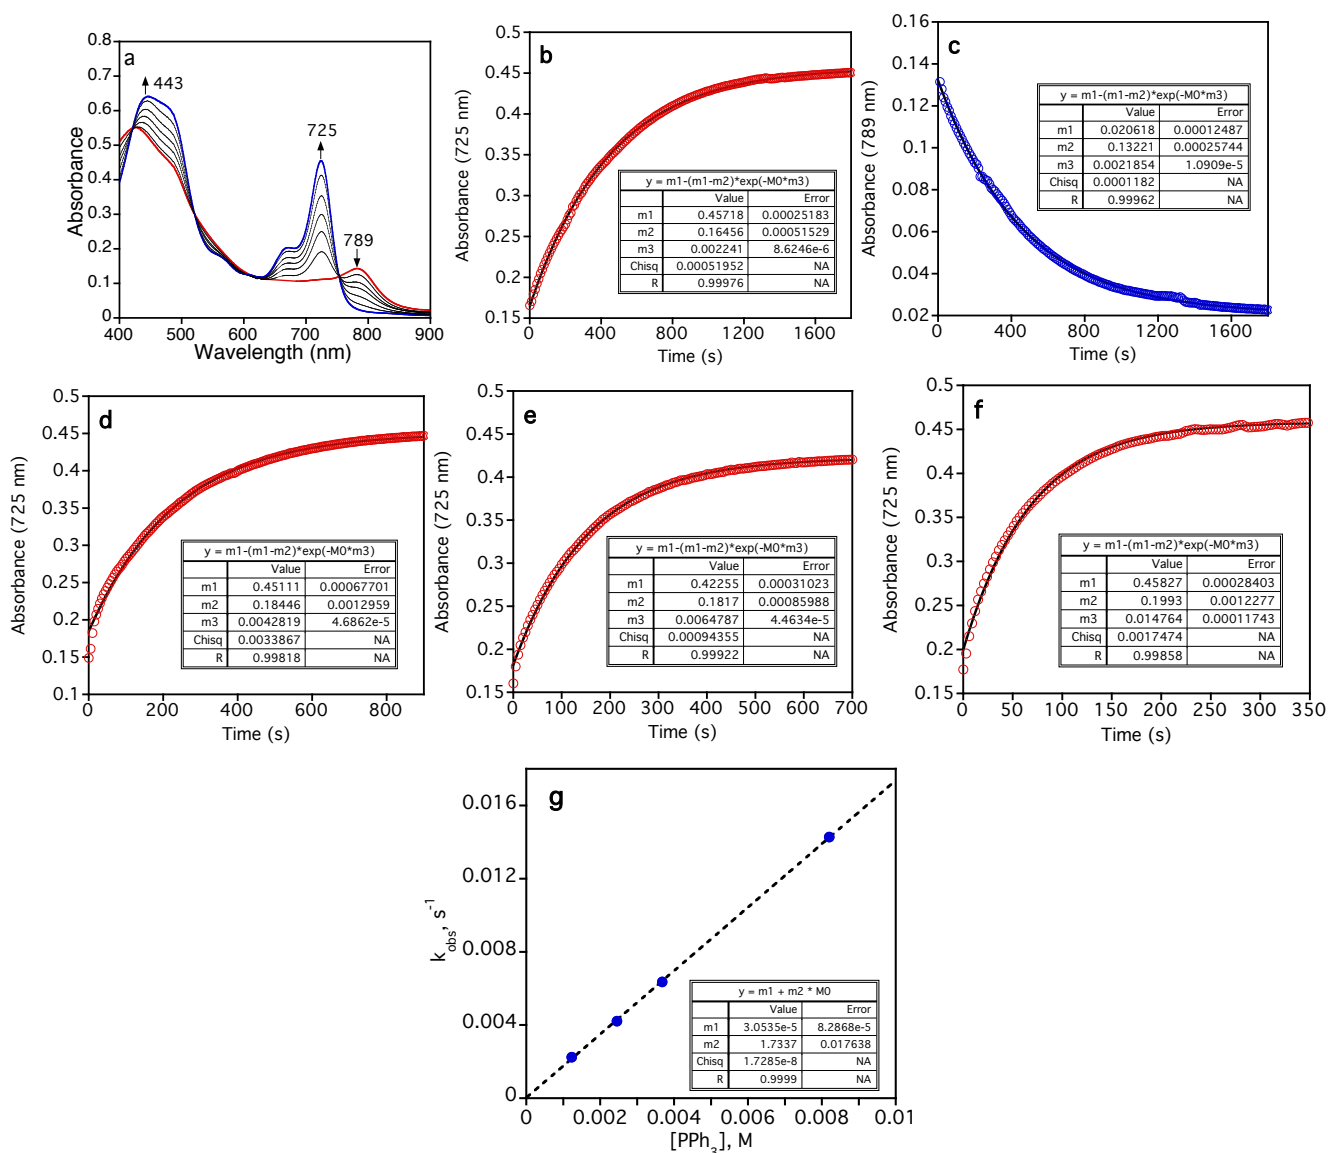

**Figure S16.** a) Representative UV-vis spectral changes (1700 s) for the reaction of  $\text{Mn}^{\text{IV}}(\text{O})(\text{TBP}_8\text{Cz}^+):\text{H}^+$  (13  $\mu\text{M}$ ) (blue line) and  $\text{PPh}_3$  (0.0012 M) forming  $\text{Mn}^{\text{III}}(\text{TBP}_8\text{Cz}):\text{H}^+$  (red line) in  $\text{CH}_2\text{Cl}_2$  at 25 °C. b) Changes in absorbance at 725 nm over time following the growth of  $\text{Mn}^{\text{III}}(\text{TBP}_8\text{Cz}):\text{H}^+$ . c) Changes in absorbance at 789 nm over time following the decay of  $\text{Mn}^{\text{IV}}(\text{O})(\text{TBP}_8\text{Cz}^+):\text{H}^+$ . Changes in absorbance at 725 nm over time for the production of  $\text{Mn}^{\text{III}}(\text{TBP}_8\text{Cz}):\text{H}^+$  after addition of varying amounts of  $\text{PPh}_3$ : d) 0.0024 M, e) 0.0036 M, and f) 0.0082 M. g) Plot of  $k_{\text{obs}}$  versus  $[\text{PPh}_3]$ .

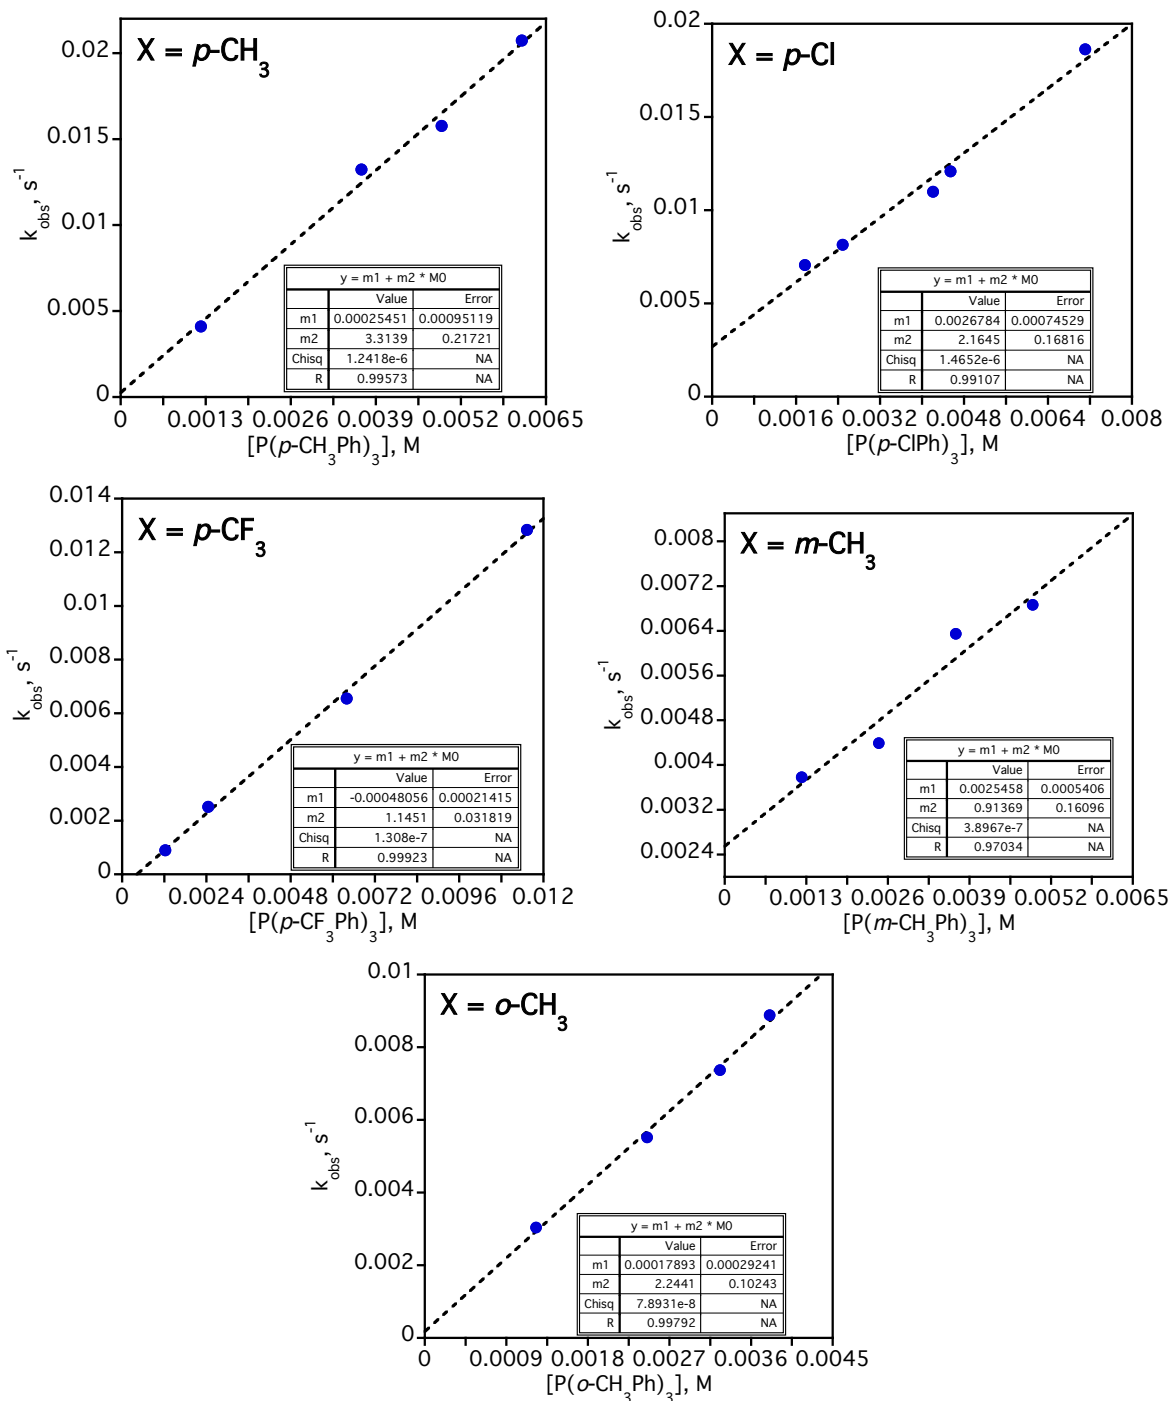

**Figure S17.** Plots of  $k_{obs}$  versus  $[P(X-Ph)_3]$  for the reaction of  $Mn^{IV}(O)(TBP_8Cz^*):H^+$  (13  $\mu M$ ) in  $CH_2Cl_2$  at 25 °C with substituted triarylphosphines: X = *p*-CH<sub>3</sub> (0.0017 – 0.007 M), *p*-Cl (0.005 – 0.02 M), *p*-CF<sub>3</sub> (0.015 – 0.043 M), *m*-CH<sub>3</sub> (0.001 – 0.006 M), *o*-CH<sub>3</sub> (0.001 – 0.006 M).

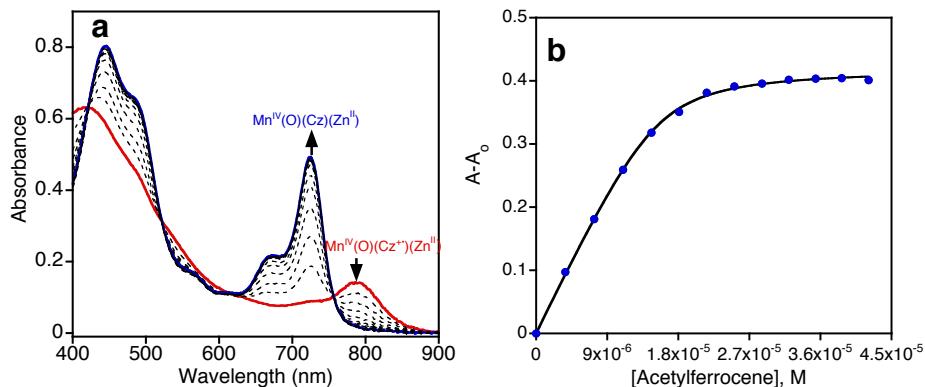

**Figure S18.** a) UV-vis spectral changes upon addition of acetylferrocene (0 – 2.25 equiv) to a solution of Mn<sup>IV</sup>(O)(TBP<sub>8</sub>Cz<sup>+</sup>):Zn<sup>II</sup> (15 μM) (red line) in 100:1 CH<sub>2</sub>Cl<sub>2</sub>/CH<sub>3</sub>CN, forming Mn<sup>IV</sup>(O)(TBP<sub>8</sub>Cz)(Zn<sup>II</sup>) (blue line) at 25 °C. b) Plot of changes in absorbance A-A<sub>0</sub> at 725 nm upon addition of small amounts of acetylferrocene.

The plot from Figure S18b was fitted by using equation S3, which was derived as follows:

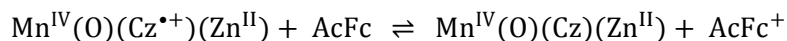

$$K_{\text{ET}} = \frac{[\text{Mn}^{\text{IV}}(\text{O})(\text{Cz})(\text{Zn}^{\text{II}})] [\text{AcFc}^+]}{[\text{Mn}^{\text{IV}}(\text{O})(\text{Cz}^{\bullet+})(\text{Zn}^{\text{II}})] [\text{AcFc}]} \quad (\text{S1})$$

$$[\text{Mn}^{\text{IV}}(\text{O})(\text{Cz})(\text{Zn}^{\text{II}})] = \frac{A - A_0}{\epsilon(\text{Mn}^{\text{IV}}(\text{O})(\text{Cz})(\text{Zn}^{\text{II}})) - \epsilon(\text{Mn}^{\text{IV}}(\text{O})(\text{Cz}^{\bullet+})(\text{Zn}^{\text{II}}))} \quad (\text{S2})$$

Equation S3 is derived from equations S1 and S2, where  $[\text{Mn}^{\text{IV}}(\text{O})(\text{Cz})(\text{Zn}^{\text{II}})] = [\text{AcFc}^+]$ ,  $[\text{Mn}^{\text{IV}}(\text{O})(\text{Cz}^{\bullet+})(\text{Zn}^{\text{II}})]_0 = [\text{Mn}^{\text{IV}}(\text{O})(\text{Cz}^{\bullet+})(\text{Zn}^{\text{II}})] + [\text{Mn}^{\text{IV}}(\text{O})(\text{Cz})(\text{Zn}^{\text{II}})]$ , and  $[\text{AcFc}]_0 = [\text{AcFc}] + [\text{AcFc}^+]$ .

$$(A - A_0) = \frac{X(Y + [\text{AcFc}]_0) - \sqrt{[X(Y + [\text{AcFc}]_0)]^2 - (4XY(X - 1)[\text{AcFc}]_0)}}{2(X - 1)/Z} \quad (\text{S3})$$

where A = absorbance throughout the titration; A<sub>0</sub> = initial absorbance; X = K<sub>ET</sub> = equilibrium constant of electron transfer; Y = [Mn<sup>IV</sup>(O)(Cz<sup>•+</sup>)(Zn<sup>II</sup>)]<sub>0</sub> = initial concentration of Mn<sup>IV</sup>(O)(TBP<sub>8</sub>Cz<sup>+</sup>)(Zn<sup>II</sup>); Z = Δε =

difference in molar absorptivities between  $\text{Mn}^{\text{IV}}(\text{O})(\text{TBP}_8\text{Cz})(\text{Zn}^{\text{II}})$  and  $\text{Mn}^{\text{IV}}(\text{O})(\text{TBP}_8\text{Cz}^+)(\text{Zn}^{\text{II}})$  at 725 nm;  $[\text{AcFc}]_0$  = initial concentration of AcFc. The plot of  $A-A_0$  versus  $[\text{AcFc}]_0$  was fit to eq S3 using the software Kaleidagraph 4.1.3 through a non-linear least-squares fitting routine in which X, Y, and Z were fitted variables.
